# Supplementary material for: Release of reactive selenium species from phthalic selenoanhydride in the presence of hydrogen sulfide and glutathione with implications for cancer research
Source: Royal Society of Chemistry journal article supplement (doi:10.1039/c9nj02245g), 2019-01-01

## Electronic Supplementary Information – New Journal of Chemistry

### Release of Reactive Selenium Species from phthalic selenoanhydride in the presence of hydrogen sulfide and glutathione with implications for cancer research

Received 00th January 20xx,  
Accepted 00th January 20xx

DOI: 10.1039/x0xx00000x

Ammar Kharma<sup>a,b</sup>, Anton Misak<sup>a</sup>, Marian Grman<sup>a</sup>, Vlasta Brezova<sup>c</sup>, Lucia Kurakova<sup>d</sup>, Peter Baráth<sup>e</sup>, Claus Jacob<sup>b</sup>, Miroslav Chovanec<sup>f</sup>, Karol Ondrias<sup>a</sup> and Enrique Domínguez-Álvarez<sup>\*g</sup>

#### General procedure for the synthesis of chalcogen anhydrides

The phthalic selenoanhydride (R-Se) and the phthalic thioanhydride (R-S) have been synthesized following a modification of a procedure previously described<sup>1,2</sup>. Briefly, a suspension of grey selenium (7.0 mmol) for R-Se or elemental sulfur for R-S (7.0 mmol) in water-free tetrahydrofuran is reduced by a dropwise addition of lithium aluminium hydride (7 mL of a 1M solution in tetrahydrofuran). After the completion of the reaction (easily monitored thanks to the ceasing of the generation of molecular hydrogen), 1.41 g (6.9 mmol) of phthaloyl chloride solved in 20 mL of dichloromethane is added to the reaction. The mixture is left reacting 1 h at 50°C with magnetic stirring). Then, the solution is filtered to eliminate the metallic salts generated during the process, and over the filtrate, 10 mL of concentrated sulfuric acid are added dropwise during 5 min. The solid is filtered and washed with chloroform (4x15 mL). The evaporation of the organic layer allowed the isolation of the impure desired product.

#### Synthesis of R-Se

Elemental grey selenium (1.10 g, 7.0 mmol), 1 M solution of lithium aluminium hydride (7 mL, 7.0 mmol), phthaloyl

chloride (1.41 g, 6.9 mmol) and concentrated sulphuric acid (10 mL) were employed. 1-benzo[c]selenophene-1,3-dione (R-Se) was obtained as a brown solid that was recrystallized from hexane to isolate a light orange/yellow solid. Yield: 80% (1160 mg). <sup>1</sup>H NMR (400 MHz, CDCl<sub>3</sub>) δ: 7.96 (dd, 2H, H<sub>3</sub>+H<sub>6</sub>, J<sub>1</sub> = 5.7 Hz, J<sub>2</sub> = 3.2 Hz); 7.76 (dd, 2H, H<sub>4</sub>+H<sub>5</sub>). <sup>13</sup>C NMR (100 MHz, CDCl<sub>3</sub>) δ: 123.8 (C<sub>3</sub>+C<sub>6</sub>); 135.1 (C<sub>1</sub>+C<sub>2</sub>), 141.9 (C<sub>4</sub>+C<sub>5</sub>), 194.2 (C=O). LC/MS±: purity: 100.0%, t<sub>R</sub> = 6.49 min.

#### Synthesis of R-S

Elemental sulfur (0.45 g, 7.0 mmol), 1 M solution of lithium aluminium hydride (7 mL, 7.0 mmol), phthaloyl chloride (1.41 g, 6.9 mmol) and concentrated sulphuric acid (10 mL) were employed. 1-benzo[c]thiophene-1,3-dione (R-S) was obtained as a yellow solid that was recrystallized from hexane to isolate a light yellow solid. Yield: 84% (951 mg). <sup>1</sup>H NMR (400 MHz, CDCl<sub>3</sub>) δ: 7.97 (dd, 2H, H<sub>3</sub>+H<sub>6</sub>, J<sub>1</sub> = 5.7 Hz, J<sub>2</sub> = 3.0 Hz); 7.81 (dd, 2H, H<sub>4</sub>+H<sub>5</sub>). <sup>13</sup>C NMR (100 MHz, CDCl<sub>3</sub>) δ: 123.9 (C<sub>3</sub>+C<sub>6</sub>); 135.2 (C<sub>1</sub>+C<sub>2</sub>), 138.9 (C<sub>4</sub>+C<sub>5</sub>), 190.0 (C=O). LC/MS±: purity: 100.0%, t<sub>R</sub> = 5.84 min.

#### NMR and LC-MS data

In next pages are provided as images the <sup>1</sup>H NMR, the <sup>13</sup>C NMR and LC-MS spectra of R-Se and R-S. The spectroscopic results are in accordance with previously published data. The molecular ion is no visible, but it is also in accordance with previous results, its abundance is low in this structures.

#### Notes and references

- 1 E. Domínguez-Álvarez, D. Plano, M. Font, A. Calvo, C. Prior, C. Jacob, J.A. Palop and C. Sanmartín, *Eur J Med Chem*, 2014, **73**, 153-166.
- 2 Domínguez-Álvarez E. PhD Dissertation. University of Navarra (Spain), 2012.

<sup>a</sup> Institute of Clinical and Translational Research, Biomedical Research Center of the Slovak Academy of Sciences, Dúbravská cesta 9, 845 05 Bratislava, Slovak Republic.

<sup>b</sup> Division of Bioorganic Chemistry, School of Pharmacy, Saarland University, Campus B2 1, D-66123 Saarbruecken, Germany.

<sup>c</sup> Faculty of Chemical and Food Technology, Slovak University of Technology, Radlinskeho 9, 812 37 Bratislava, Slovak Republic.

<sup>d</sup> Department of Pharmacology and Toxicology, Faculty of Pharmacy, Comenius University, Ulica Odbojárov 10, 832 32 Bratislava, Slovak Republic.

<sup>e</sup> Institute of Chemistry, Slovak Academy of Sciences, Dúbravská cesta 9, 845 38 Bratislava, Slovakia.

<sup>f</sup> Cancer Research Institute, Biomedical Research Center of the Slovak Academy of Sciences, Dúbravská cesta 9, 845 05 Bratislava, Slovak Republic.

<sup>g</sup> Instituto de Química Orgánica General, Consejo Superior de Investigaciones Científicas (IQOG, CSIC), Juan de la Cierva 3, 28006 Madrid, Spain.

Electronic Supplementary Information (ESI) available: [details of any supplementary information available should be included here]. See DOI: 10.1039/x0xx00000x

# <sup>1</sup>H NMR of R-Se and R-S

## R-Se (1H NMR)

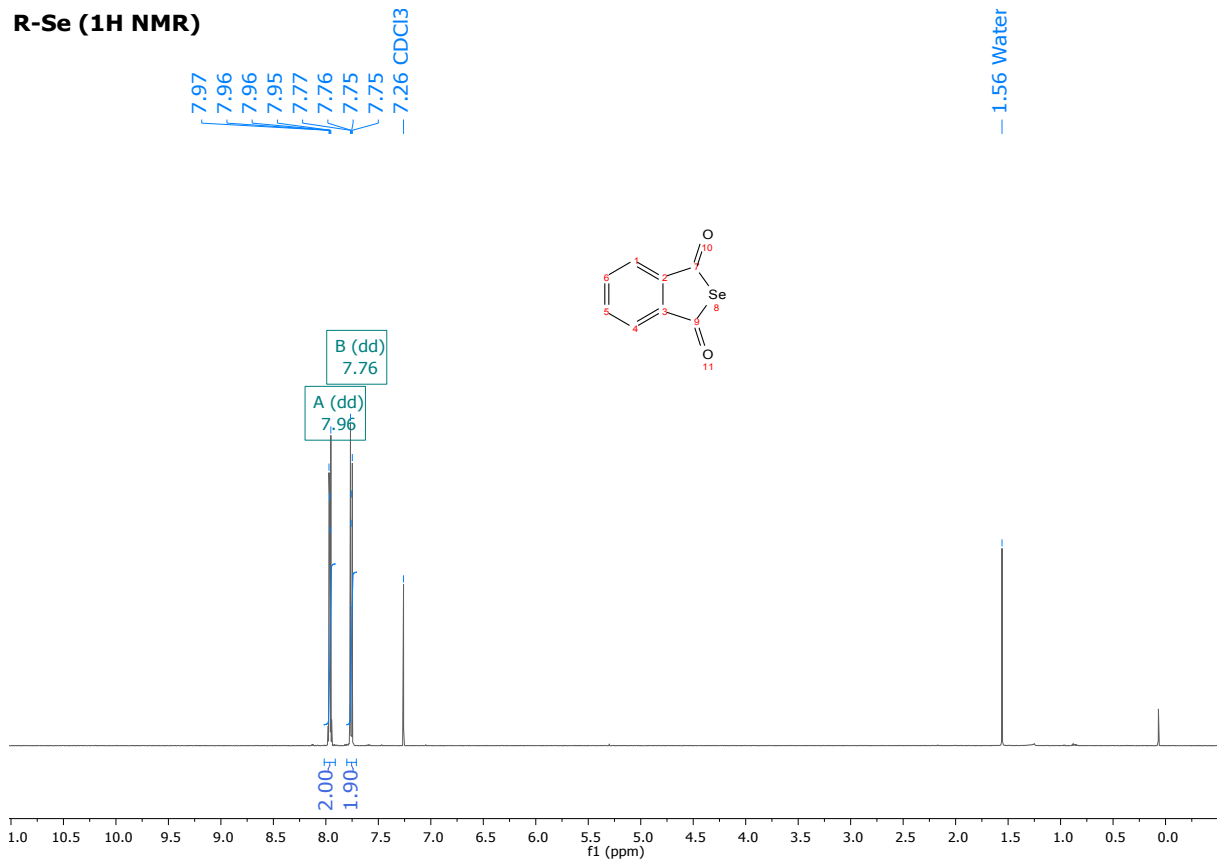

## R-Se (1H NMR, Zoom)

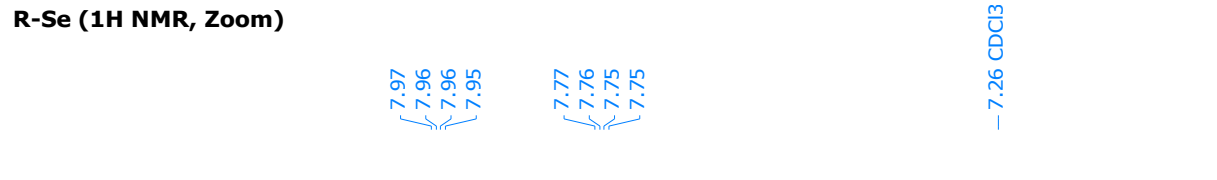

## R-S (1H NMR)

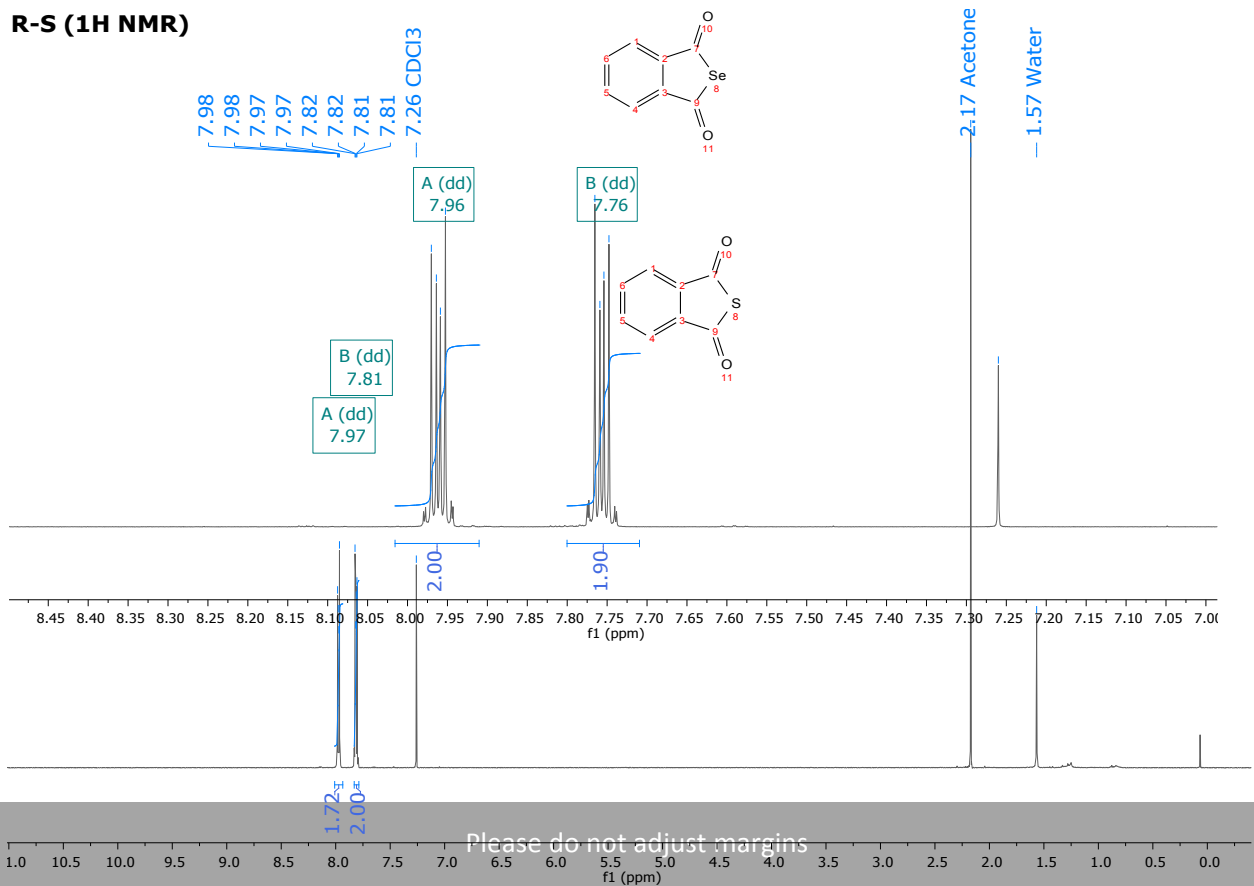

**R-S (1H NMR, Zoom)**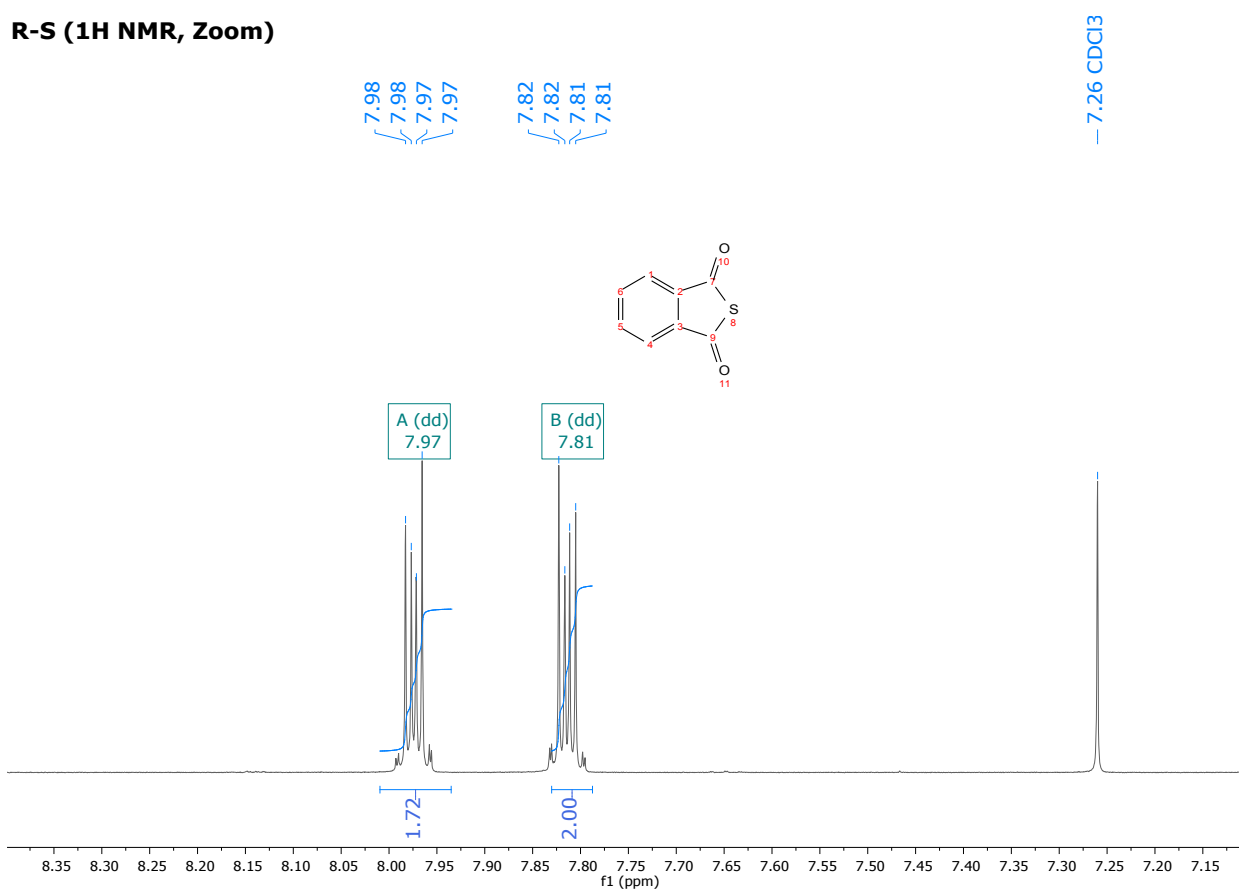

**$^{13}\text{C}$  NMR of R-Se and R-S****R-Se ( $^{13}\text{C}$  NMR)**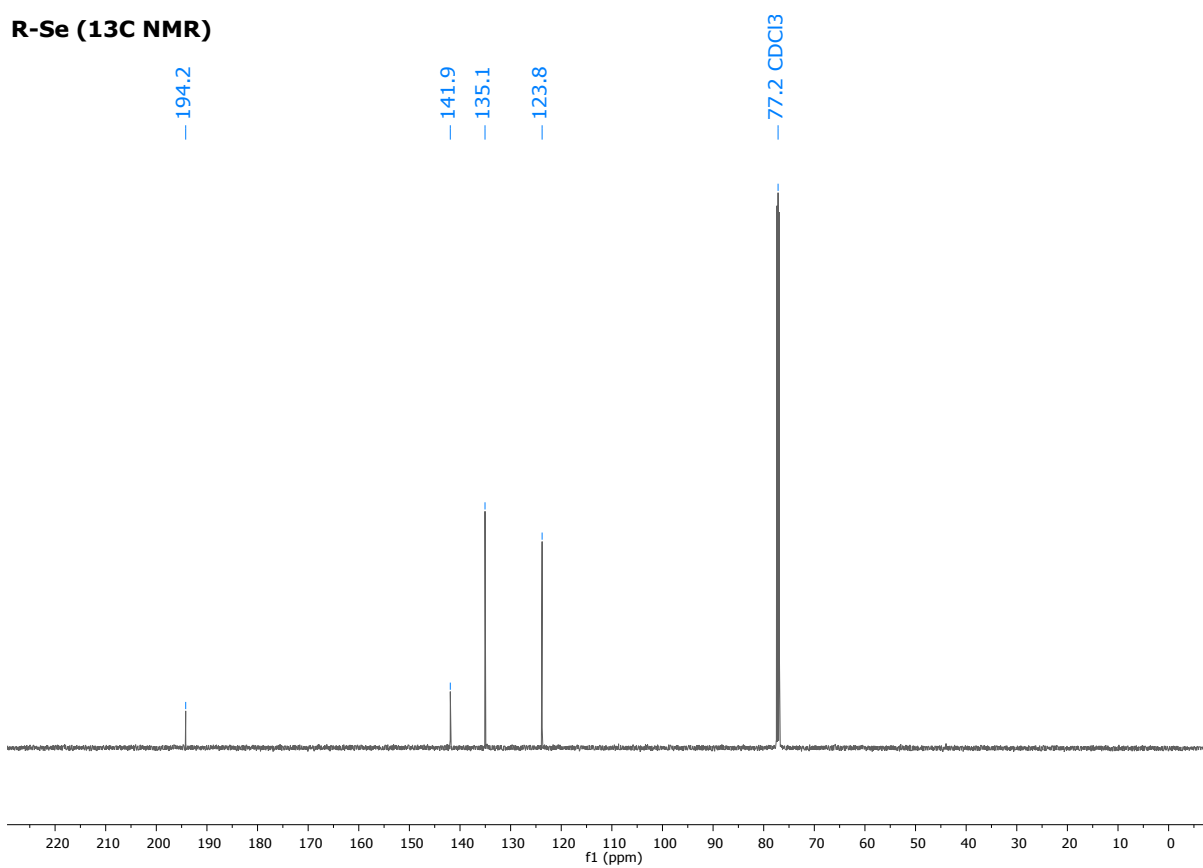**R-S ( $^{13}\text{C}$  NMR)**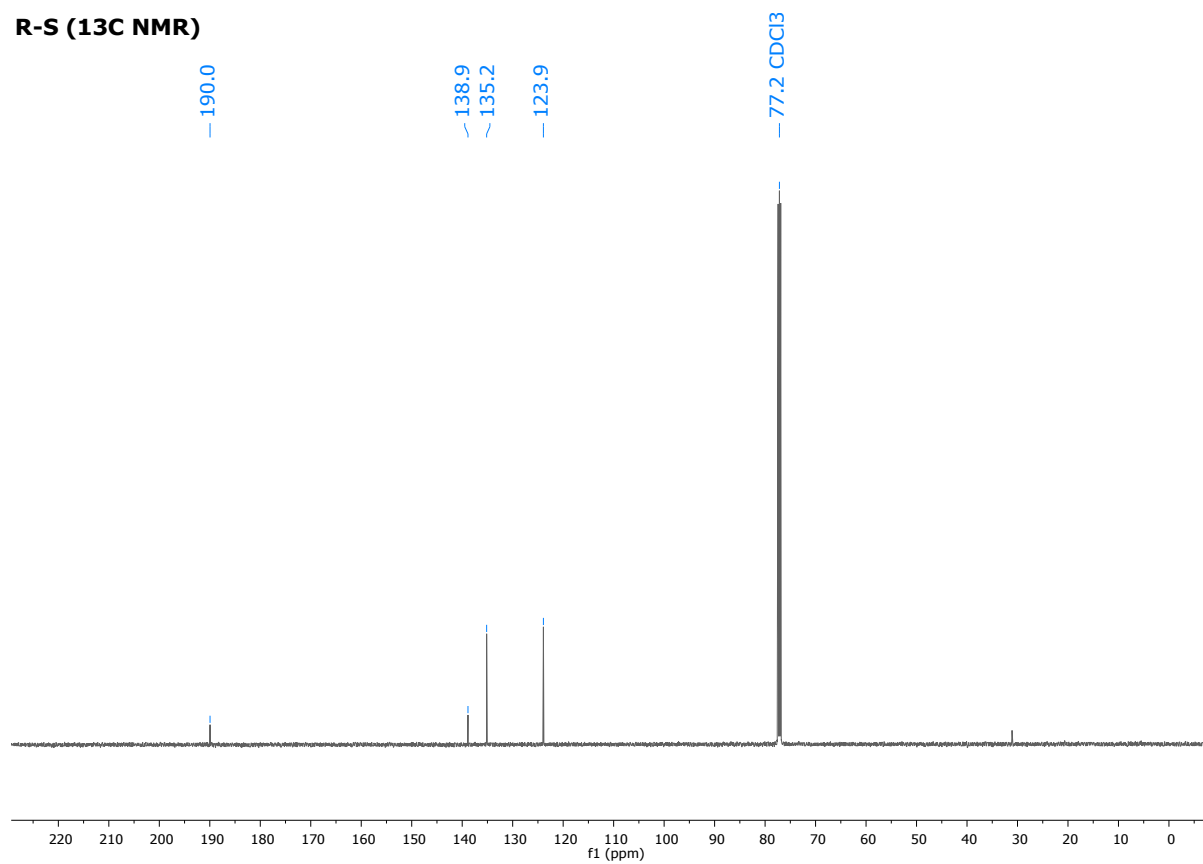

# LC-MS of R-Se

RT: 0.00 - 11.99

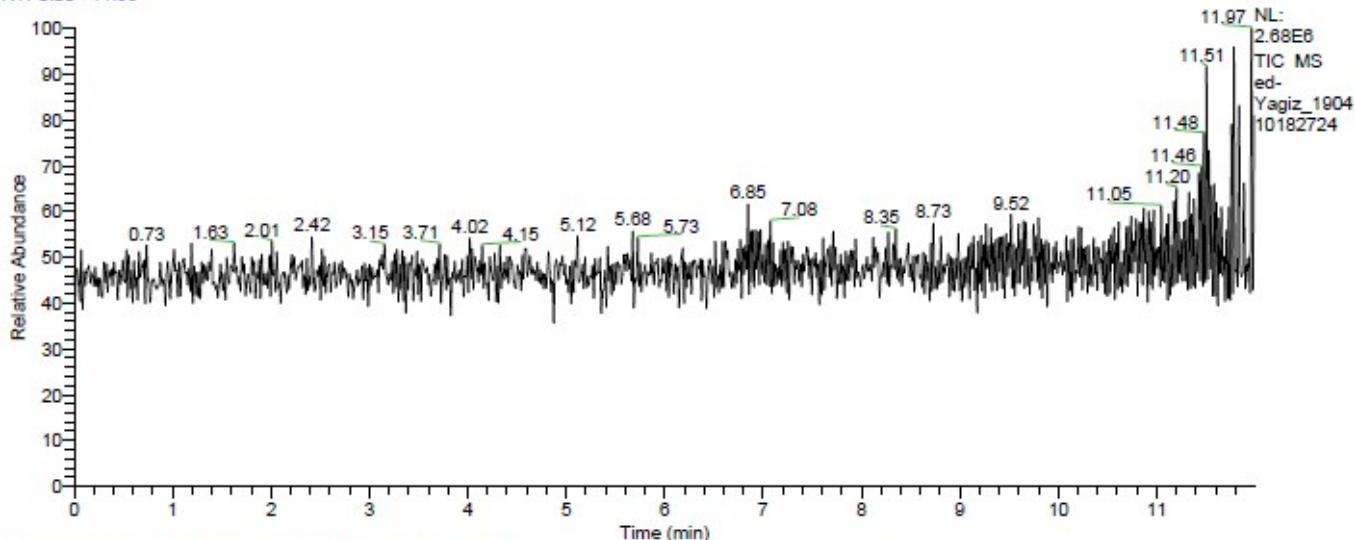

ed-Yagiz\_190410182724 #525 RT: 6.67 AV: 1 NL: 1.07E4  
T: (0,0) + c ESI Icorona sid=75.00 det=1353.00 Full ms [100.00-1000.00]

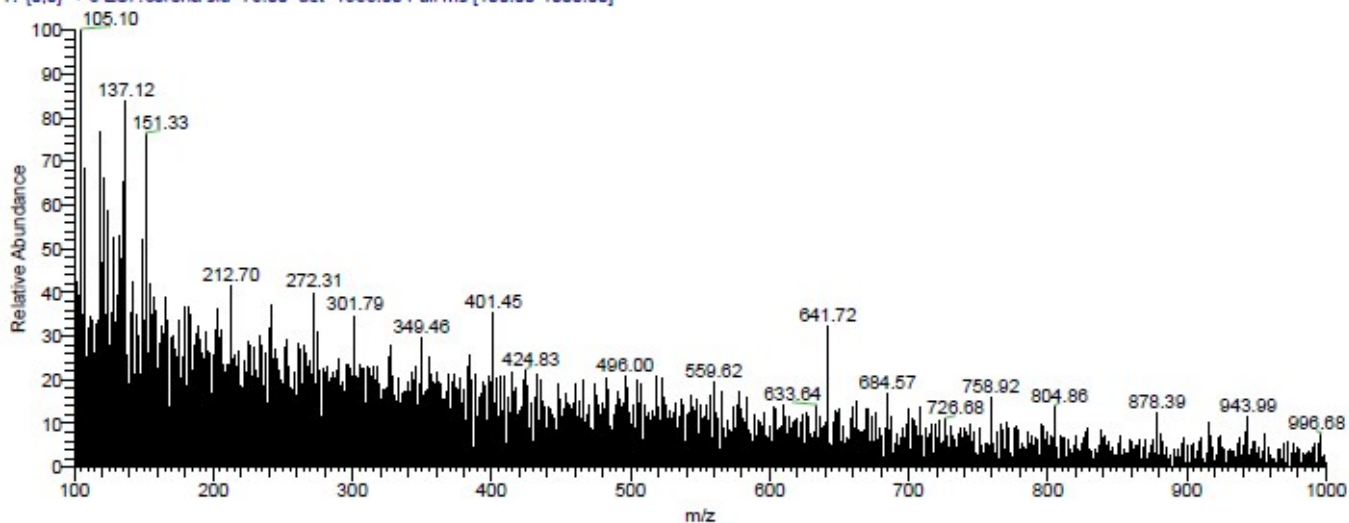

RT: 0.00 - 12.10

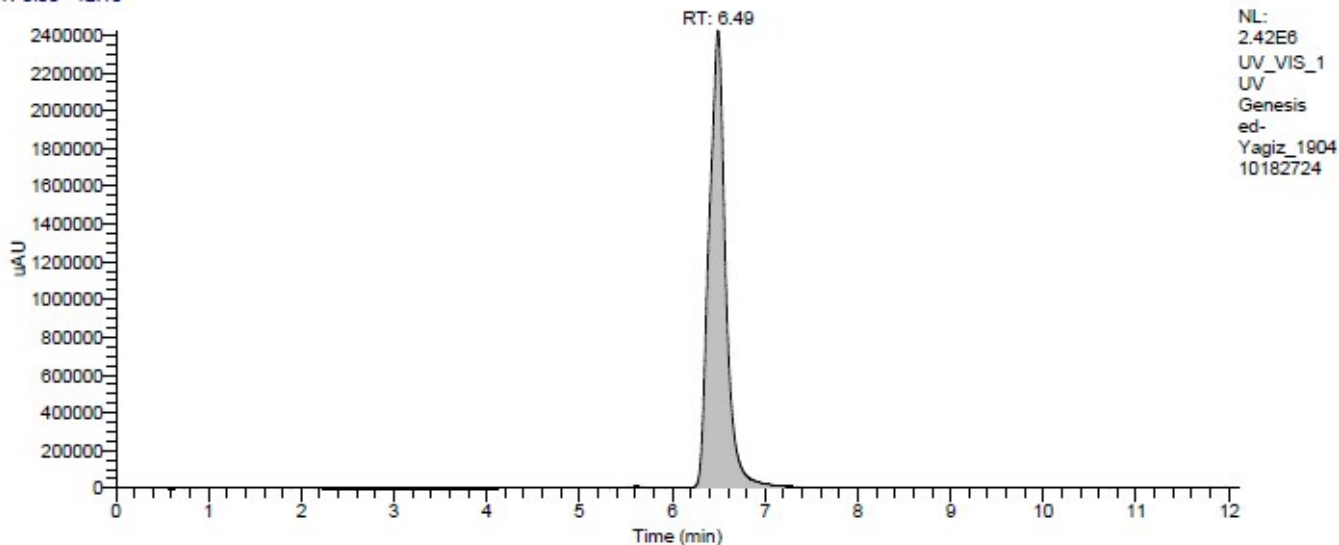

## LC-MS of R-S

RT: 0.00 - 11.99

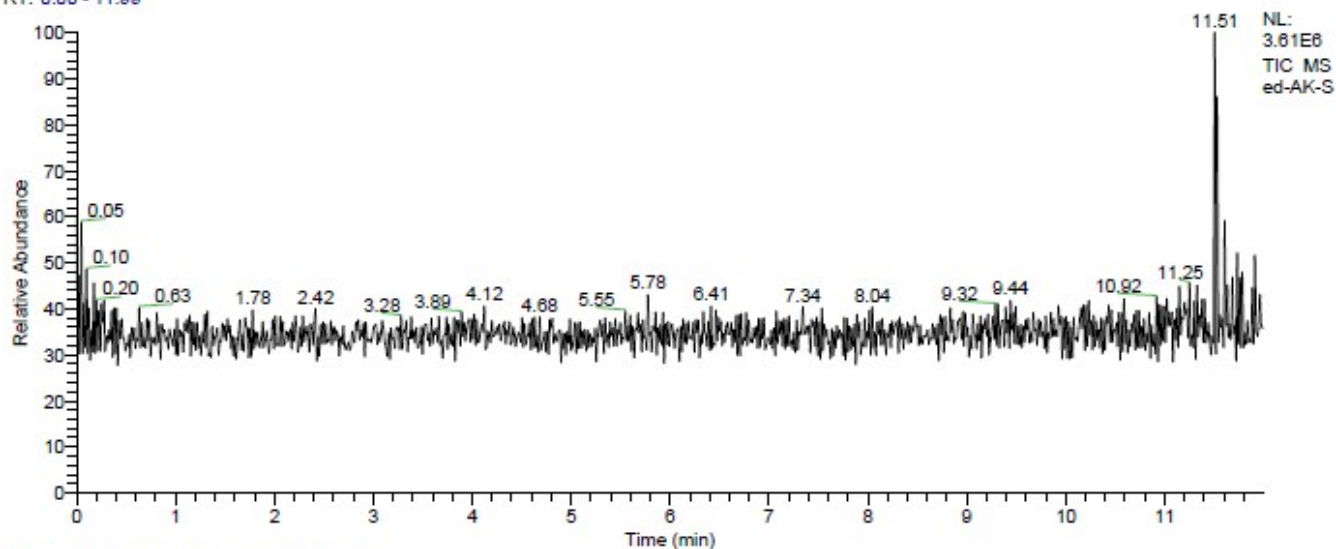

ed-AK-S #489 RT: 6.21 AV: 1 NL: 8.91E3

T: {0,0} + c ESI !corona sid=75.00 det=1353.00 Full ms [100.00-1000.00]

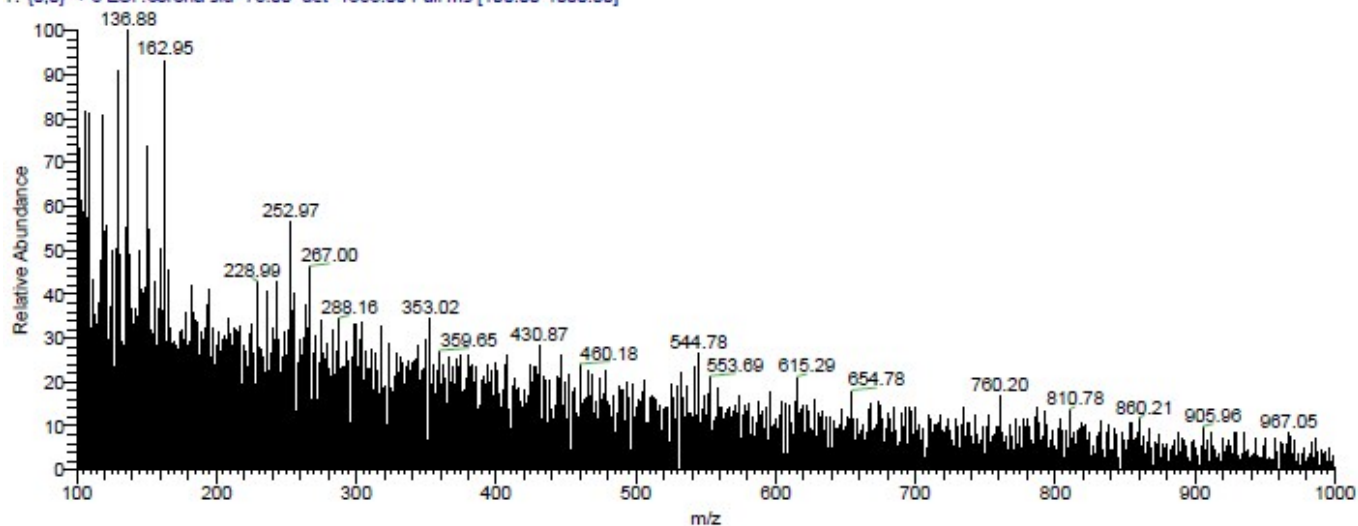

RT: 0.00 - 12.10

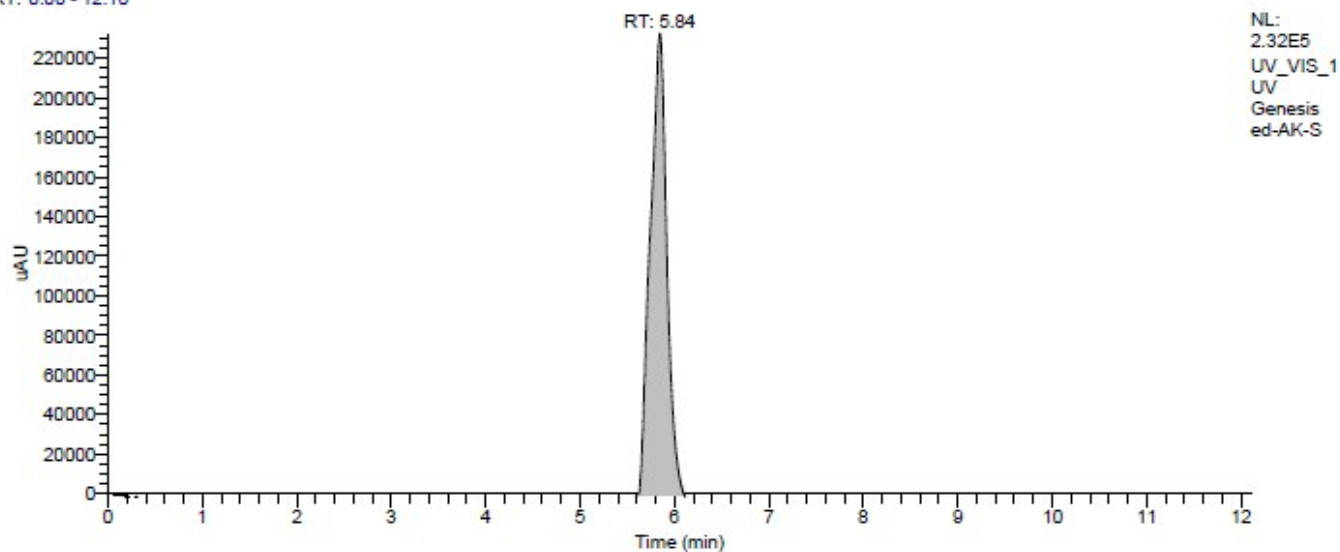

Supplement: c9nj02245g1.pdf [file c9nj02245g1.pdf]
